# Supplementary material for: Molecular Characterization of Hetero-Pathogenic and Diarrheagenic Escherichia coli Pathotypes in Diarrheic Children under Five Years and Exposure Environment in Ogun State, South-West Nigeria
Source: MDPI journal article supplement (doi:10.3390/pathogens12111358), 2023-11-15
Supplement: s1 [file s1]

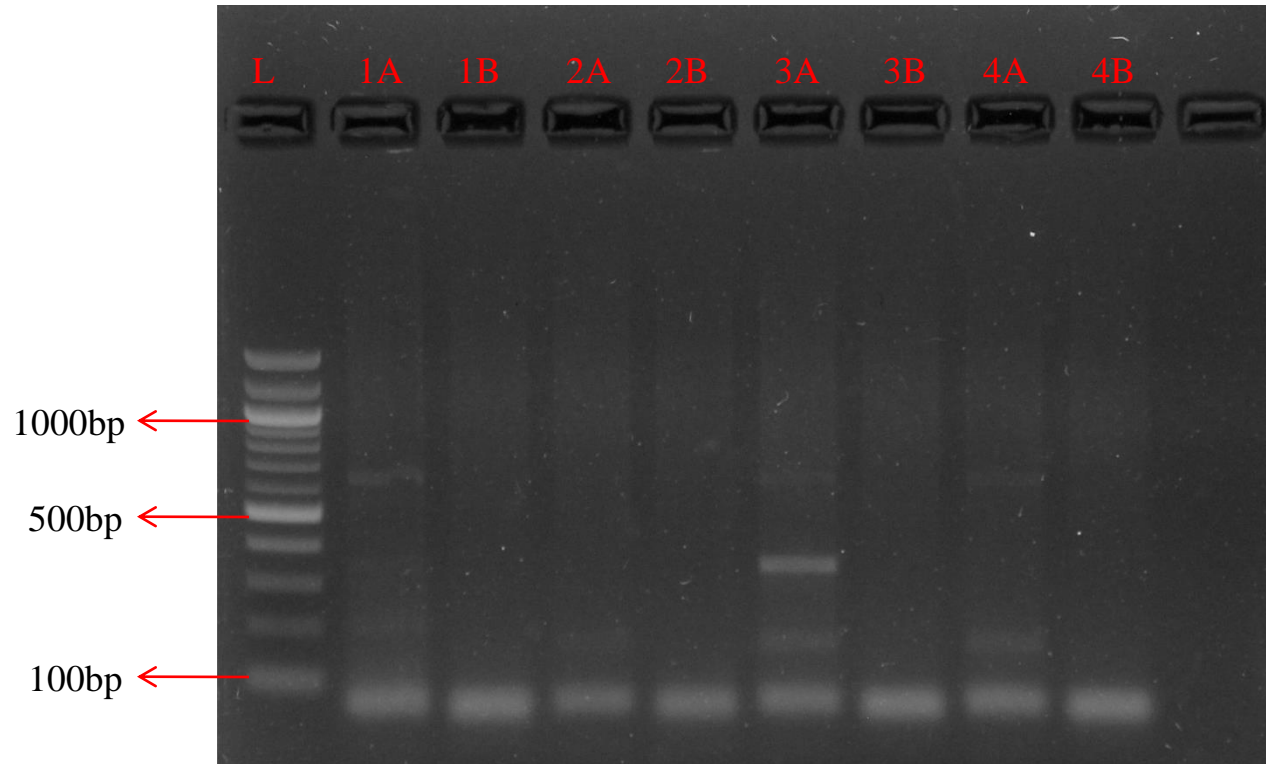

**A.** Human *estA* (StFh and StRh primers) – 151bp  
*vtx1* – 260bp  
*vtx2* – 420bp  
*ipaH* – 647bp

1 – FH21E (*ipaH*)  
 2 – FH24E  
 3 – SH 70E (Human *estA*, *vtx1*, *ipaH*)  
 4 – FH25E (Human *estA*, *ipaH*)

**B.** Porcine *estA* (StFp and StRp primers) – 160bp  
*eae* – 377bp  
*eltA* – 479bp

Figure S1a: Agarose gel electrophoresis image of multiplex PCR amplicon of DEC isolates. L: 100bp molecular ladder. Sample codes: 1A-4B

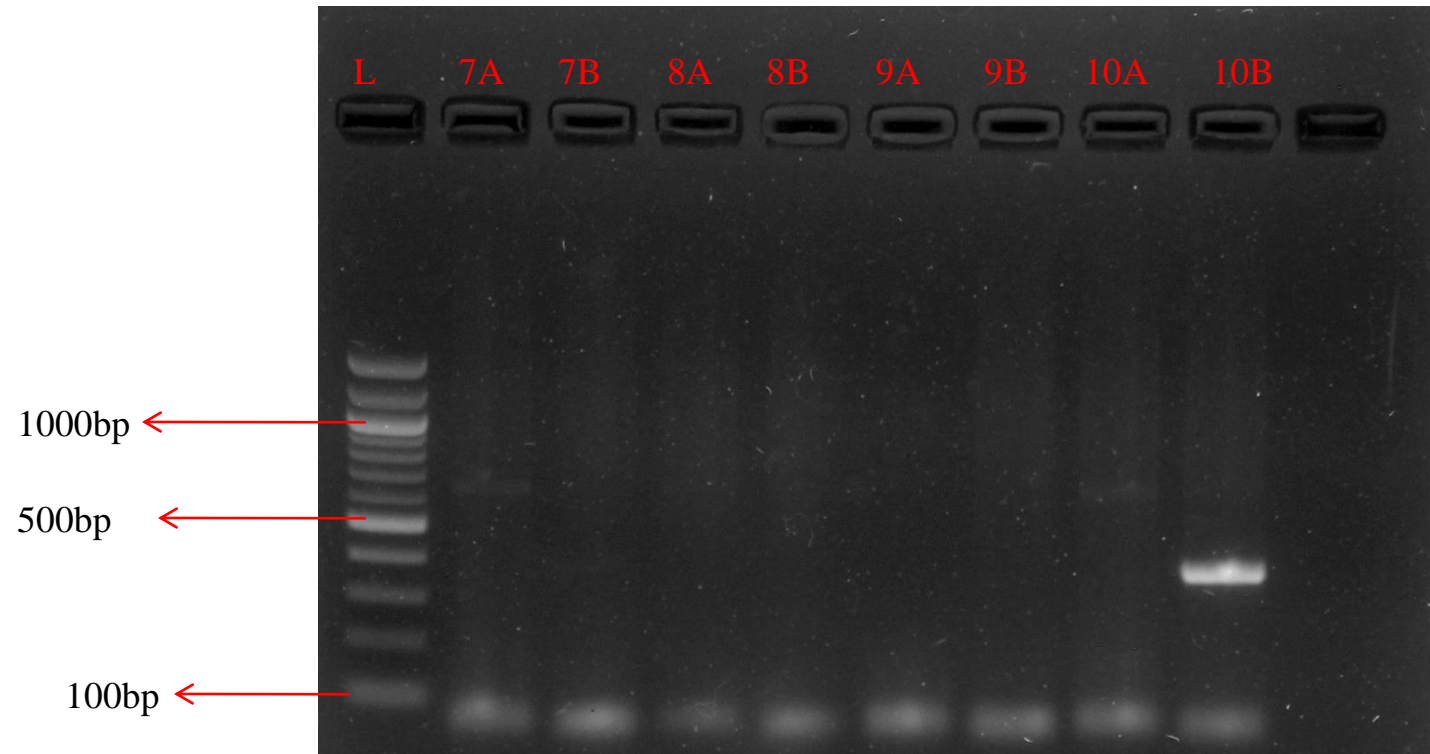

**A.** Human *estA* (StFh and StRh primers) – 151bp  
*vtx1* – 260bp  
*vtx2* – 420bp  
*ipaH* – 647bp

7 – FH23E (*ipaH*)  
 8 – FH22E  
 9 – SH 73E  
 10 – SH74E (*ipaH*, *eae*)

**B.** Porcine *estA* (StFp and StRp primers) – 160bp  
*eae* – 377bp  
*eltA* – 479bp

Figure S1b: Agarose gel electrophoresis image of multiplex PCR amplicon of DEC isolates. L: 100bp molecular ladder. Sample codes: 7A-10B

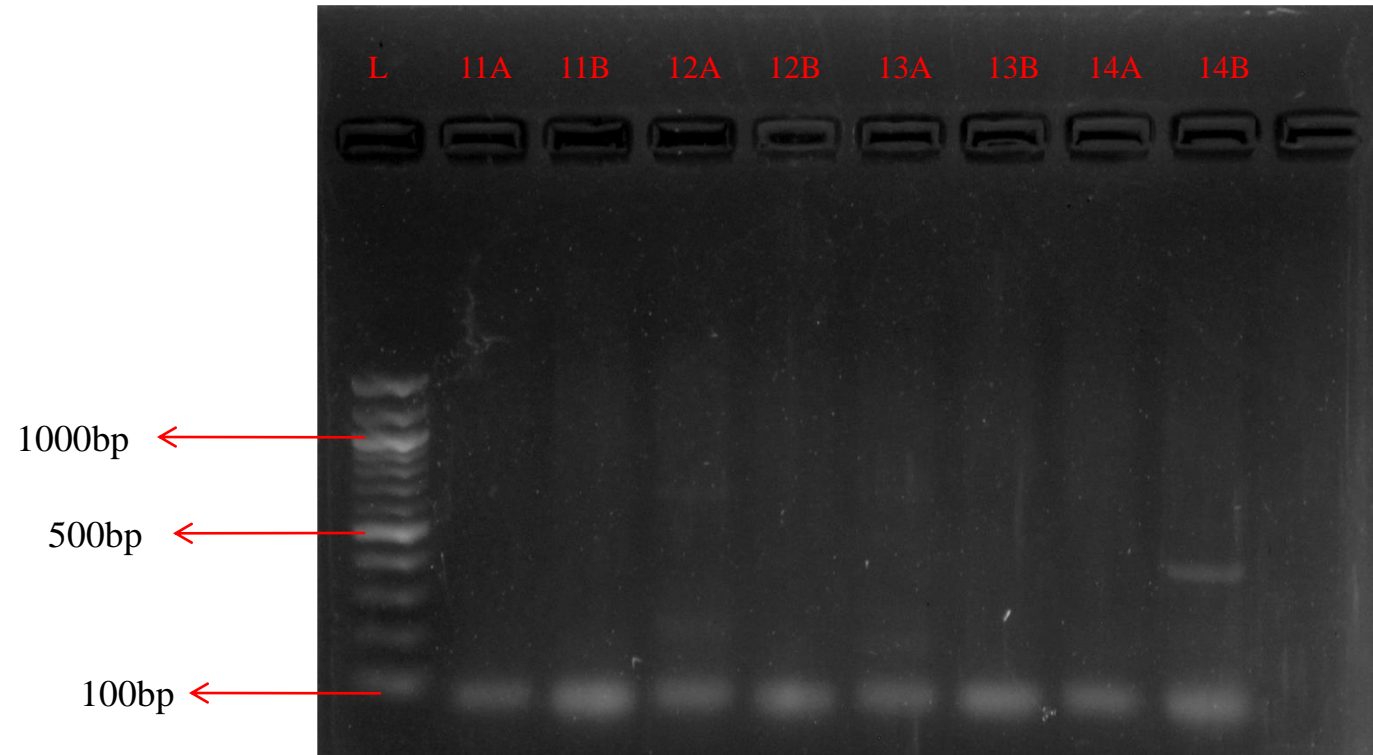

**A.** Human *estA* (StFh and StRh primers) – 151bp  
*vtx1* – 260bp  
*vtx2* – 420bp  
*ipaH* – 647bp

11 – SH68E  
 12 – SH65E (Human *estA* , *ipaH*)  
 13 – SH61E  
 14 – SH67E (*eae*)

**B.** Porcine *estA* (StFp and StRp primers) – 160bp  
*eae* – 377bp  
*eltA* – 479bp

Figure S1c: Agarose gel electrophoresis image of multiplex PCR amplicon of DEC isolates. L: 100bp molecular ladder. Sample codes: 11A-14B

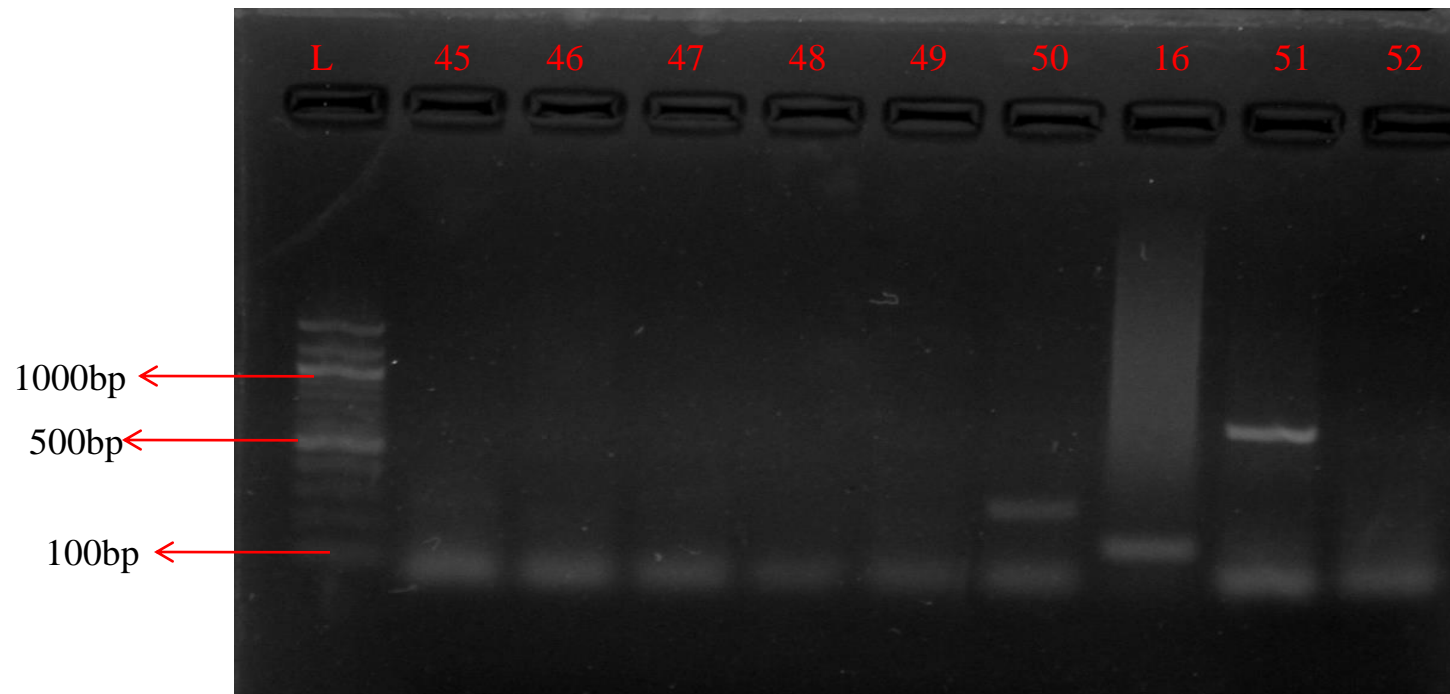

**A.** Human *estA* (StFh and StRh primers) – 151bp  
*vtx1* – 260bp  
*vtx2* – 420bp  
*ipaH* – 647bp

**B.** Porcine *estA* (StFp and StRp primers) – 160bp  
*eae* – 377bp  
*eltA* – 479bp

45– SH90E

46 – GH4E

47 – SH93E

48 –SH92E

49 –SH4A

50 –OF1A (*vtx1*)

16 –SH100E (Human *estA*)

51 –FH11E (*ipaH*)

52 –FH12E

Figure S1d: Agarose gel electrophoresis image of multiplex PCR amplicon of DEC isolates. L: 100bp molecular ladder. Sample codes: 45-52



**A.** Human *estA* (StFh and StRh primers) – 151bp  
*vtx1* – 260bp  
*vtx2* – 420bp  
*ipaH* – 647bp

**B.** Porcine *estA* (StFp and StRp primers) – 160bp  
*eae* – 377bp  
*eltA* – 479bp

11 – SH68E  
 12 – SH65E (Human *estA* , *ipaH*)  
 13 – SH61E  
 14 – SH67E (*eae*)

Figure S1e: Agarose gel electrophoresis image of multiplex PCR amplicon of DEC isolates. L: 100bp molecular ladder. Sample codes: 1A-4B

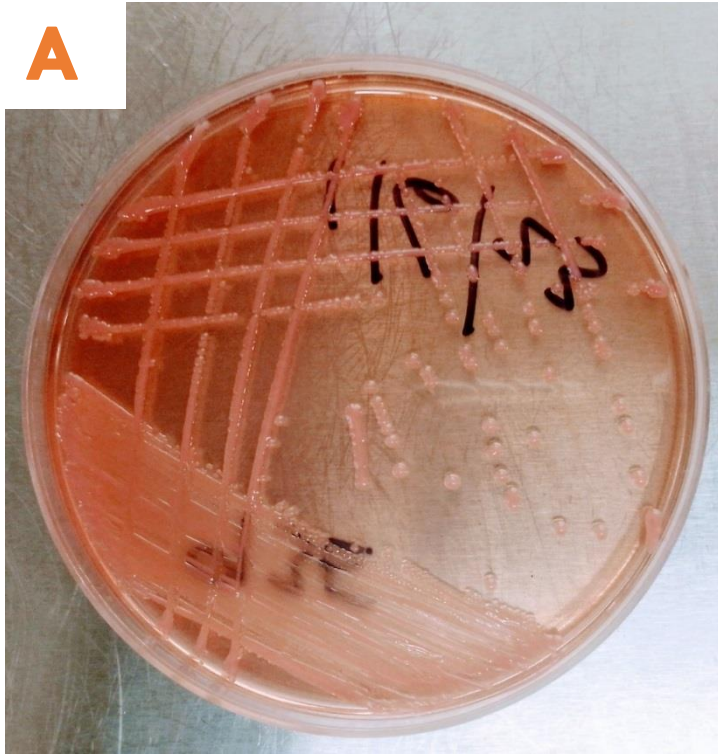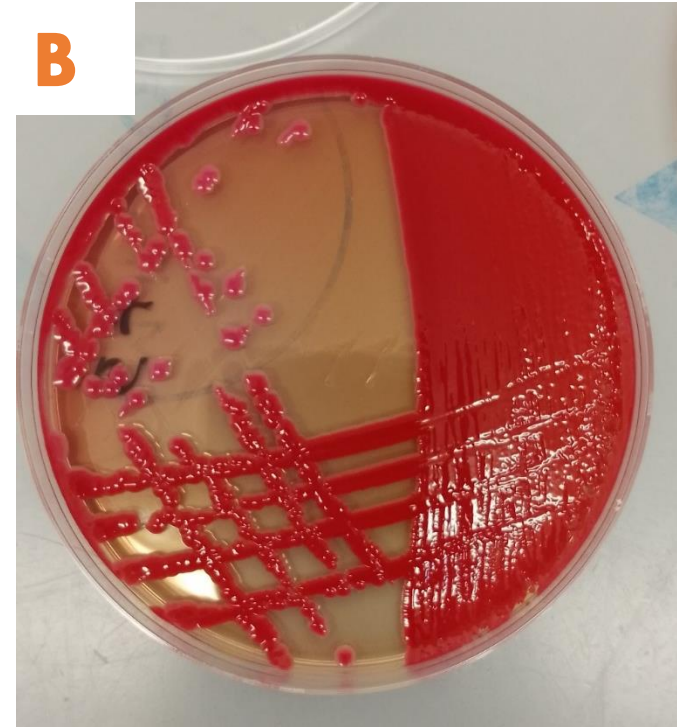

Figure S2: Growth of presumptive DEC colonies on Sorbitol MacConkey Agar (A-Sorbitol fermenter and B- Non Sorbitol fermenter)

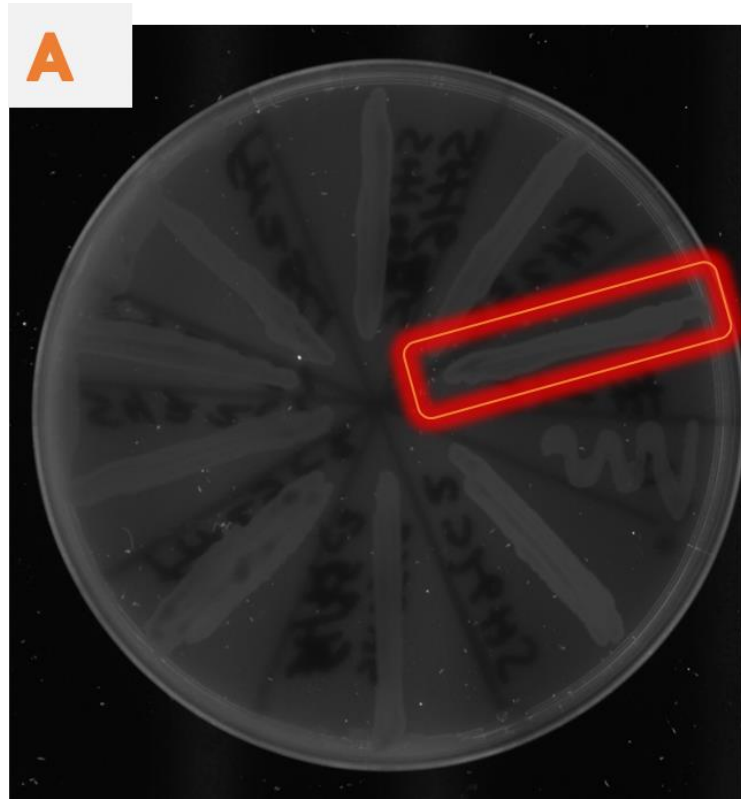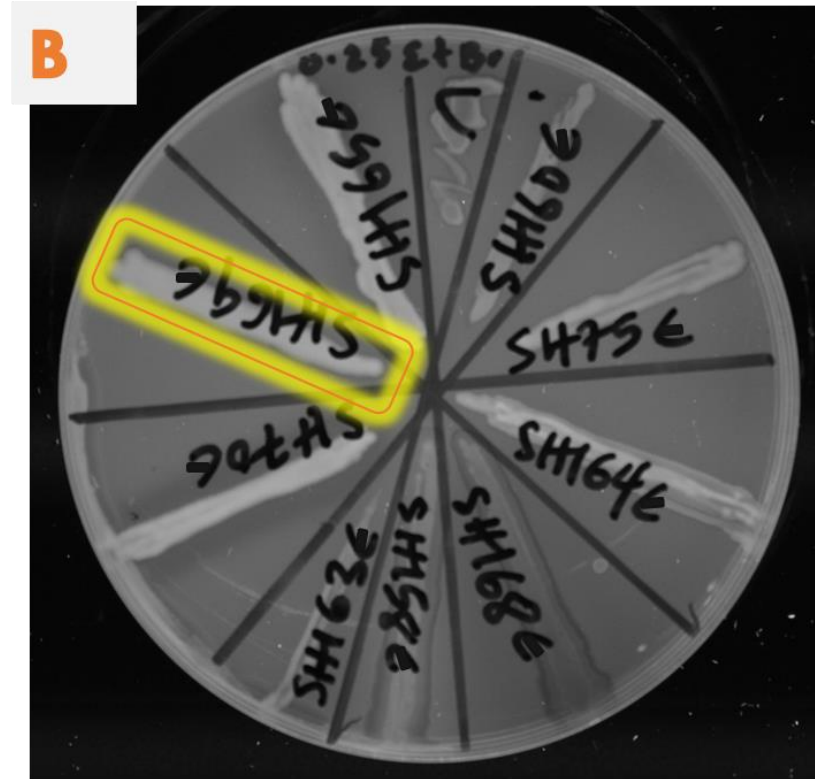

Figure S3: Over expression of efflux pump assay for multidrug resistant DEC isolates. A (Red box): over expression of efflux pump activity. B (Yellow box): No efflux pump activity
